# Supplementary material for: Satellite cell senescence underlies myopathy in a mouse model of limb-girdle muscular dystrophy 2H
Source: JCI journal article supplement (doi:10.1172/jci59581), 2012-04-16
Supplement: sd1 [file 1]

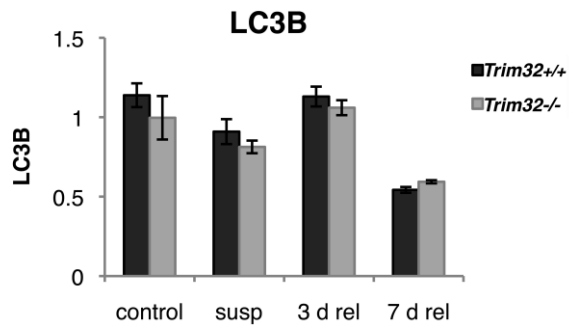

### Supplemental Figure 1

*Autophagy marker LC3B is not changed in Trim32<sup>-/-</sup> muscles.*

Densitometry data of western blots of soleus muscle extracts from hind-limb suspension experiment stained with autophagy marker LC3B did not reveal a statistically significant difference between *Trim32*<sup>-/-</sup> and *Trim32*<sup>+/+</sup>. Data are normalized to loading control and shown as mean  $\pm$  s.e.m.

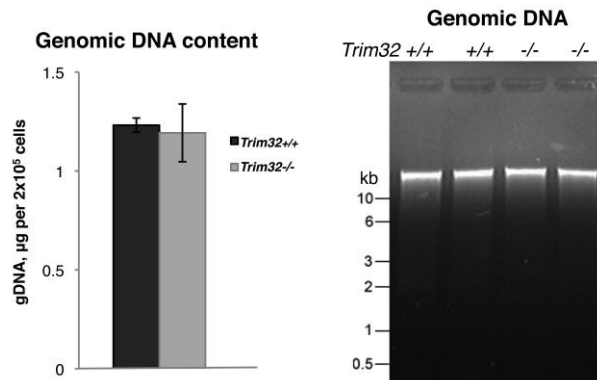

## Supplemental Figure 2

*Total amount of genomic DNA is not changed in Trim32<sup>-/-</sup> myoblasts. Equal amounts of genomic DNA were isolated from Trim32<sup>-/-</sup> and Trim32<sup>+/+</sup> myoblasts as revealed by spectrophotometric analysis of gDNA purified from equal amount of Trim32<sup>-/-</sup> and Trim32<sup>+/+</sup> cells. Data are shown as mean ± s.e.m. Representative agarose gel is shown for quality control of the gDNA preparation.*

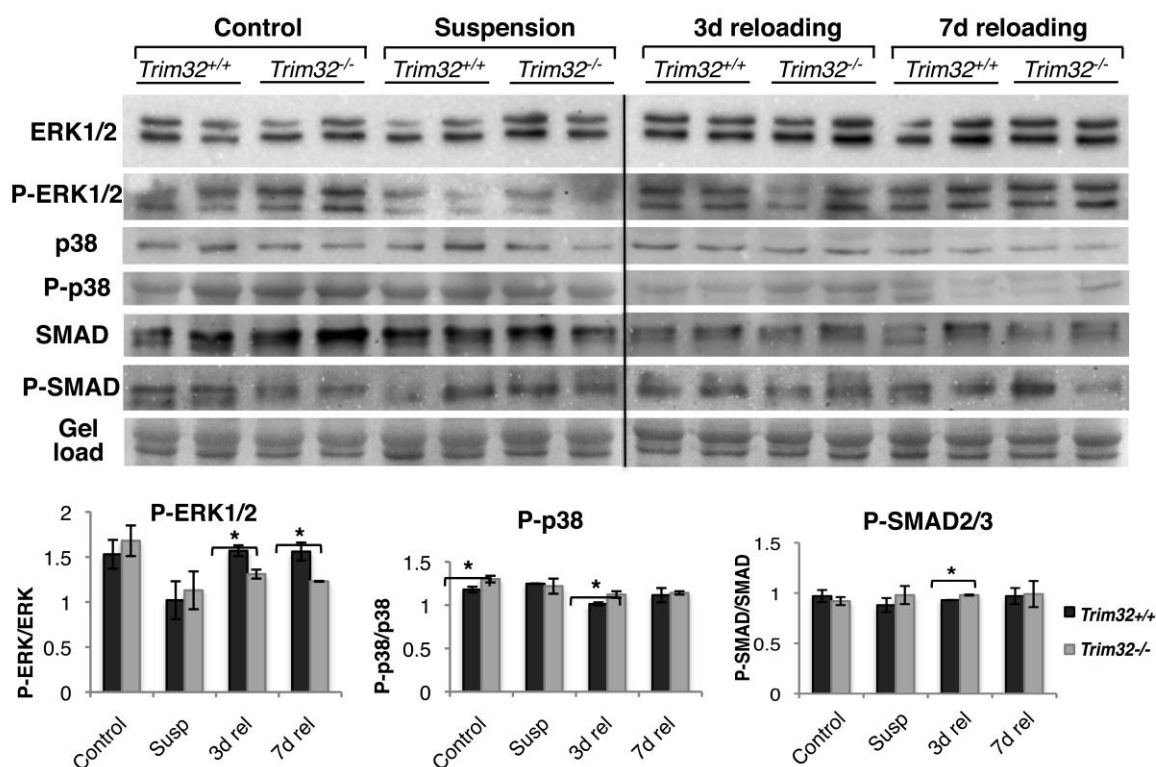

### Supplemental Figure 3

Canonical and non-canonical TGF- $\beta$  signaling in *Trim32*<sup>-/-</sup> and *Trim32*<sup>+/+</sup> muscles during unloading/reloading. Representative western blots of soleus muscle extracts from ambulatory control (control), suspended for 5 d (suspension), and reloaded for 3 or 7 days mice were stained with total ERK1/2, activated ERK1/2-phospho-specific antibodies, total p38, phospho-p38, SMAD2/3, and phospho-SMAD2/3 antibodies. Ponceau S stained blots are shown for loading control. Densitometry data of activated P-ERK1/2, P-p38, and P-SMAD2/3 blots were normalized to total ERK1/2, total p38 or total SMAD2/3, respectively. A modest 11% increase in P-p38, a 5% increase in P-SMAD2/3, and a 17-20% decrease in P-ERK1/2 was observed in *Trim32*<sup>-/-</sup> muscles subjected to reloading, compared to *Trim32*<sup>+/+</sup> muscles. P-p38 was also increased by 10% in *Trim32*<sup>-/-</sup> control muscles, compared to *Trim32*<sup>+/+</sup> littermates. Data are shown as mean  $\pm$  s.e.m (\*p<0.05).
